# Supplementary material for: Predicting Arabidopsis Freezing Tolerance and Heterosis in Freezing Tolerance from Metabolite Composition
Source: PubMed Central journal article supplement — Mol Plant. 2009 Dec 21;3(1):224–35. doi: 10.1093/mp/ssp105 (PMC2807929; doi:10.1093/mp/ssp105), 2009-12-21
Supplement: ssp105_1.pdf [file ssp105_1.pdf]

# 1. PLS\*-Regression: $Y \sim X$

Here  $Y$  is the given response vector ( $N \times 1$ ) and  $X$  the given matrix ( $N \times p$ ) of describing variables.

## 2. Computation of $VIP^{**}$ for each variable $X_1, \dots, X_p$

3. Order variables  $X_1, \dots, X_p$  with respect to  $VIP$  (descending).  $\rightarrow X_{1:p}, \dots, X_{p:p}$

## 4. For $j = 1, \dots, p$ do PLS\*-Regression: $Y \sim (X_{1:p}, \dots, X_{j:p})$

5. Select number  $j_{opt}$  such that the corresponding model  $Y \sim (X_{1:p}, \dots, X_{j_{opt}:p})$  has highest  $R^2$  in CV.  $\rightarrow X_{new} := (X_{1:p}, \dots, X_{j_{opt}:p})$

## 6. PLS\*-Regression: $Y \sim X_{new}$

7. Generate 5000 different permutations of response  $Y$ .  $\rightarrow Y_{perm}[1], \dots, Y_{perm}[5000]$

## 8. Test significance of the correlation $R = \text{cor}(Y, Y_{cv})$ by comparing to $\text{cor}(Y_{perm}[k], Y_{cv})$ for $k = 1, \dots, 5000$ :

Compute mean and  $s$  of  $\text{cor}(Y_{perm}[k], Y_{cv})$ ,  $k = 1, \dots, 5000$ . Compute distance of  $R$  and mean as measured by  $s$ ; estimate P-value, assuming  $N(\text{mean}, s^2)$ .

\* Partial Least Squares Regression: Projecting describing variables to latent variables  $T_1, \dots, T_m$ , such that  $R^2$  is maximized in CV of the OLS-model  $Y \sim T$  with respect to  $m$

\*\* Variable Importance in the Projection of  $X_j$ : Contribution to  $Y$  of those latent variables with high weights in  $X_j$

Fit  $Y = c_0 + c_1 \cdot T_1 + \dots + c_m \cdot T_m$

with  $T_i = w_{i1}X_1 + \dots + w_{ip}X_p$  for  $i = 1, \dots, m$

$$VIP(X_j) = \sqrt{\frac{\sum_{i=1}^m (w_{ij} \cdot \text{cor}(Y, T_i))^2}{\sum_{i=1}^m (\text{cor}(Y, T_i))^2}} \cdot p$$

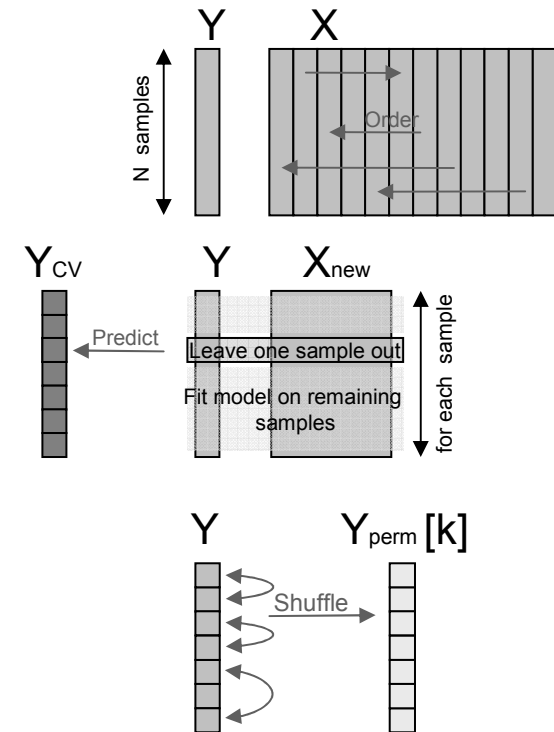

### Abbreviations:

- CV : Cross Validation (Leave-one-out)
- $Y_{cv}$  : Response predicted in CV
- $R^2$  : Squared correlation of  $Y$  and  $Y_{cv}$
- $s$  : Sample standard deviation
- OLS: Ordinary Least Squares
