# Supplementary figures and images for: Predicting Arabidopsis Freezing Tolerance and Heterosis in Freezing Tolerance from Metabolite Composition
Source: PubMed Central journal article supplement — Mol Plant. 2009 Dec 21;3(1):224–35. doi: 10.1093/mp/ssp105 (PMC2807929; doi:10.1093/mp/ssp105), 2009-12-21

A

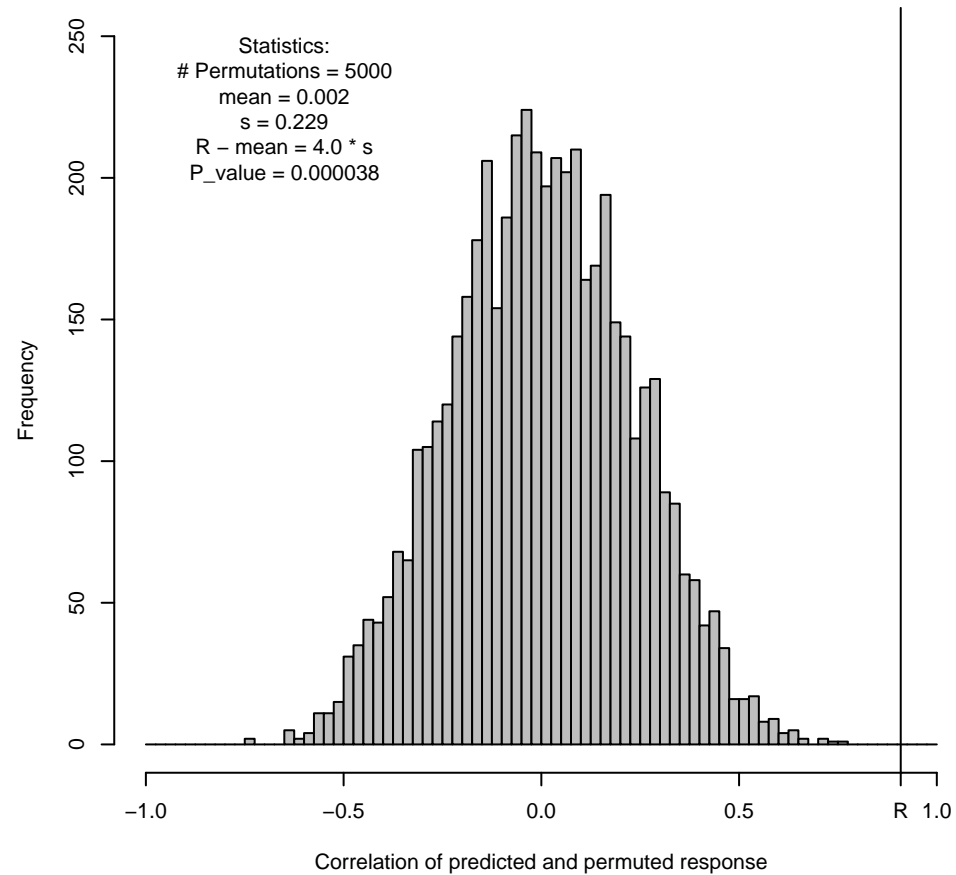

B

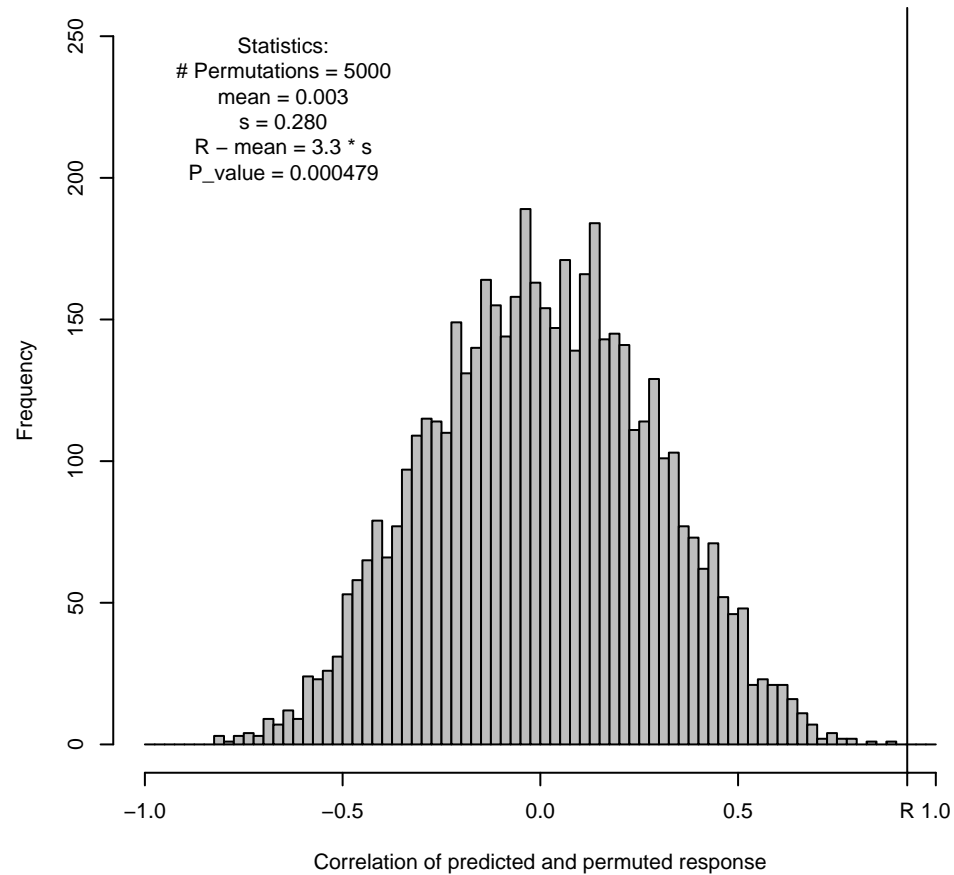

C

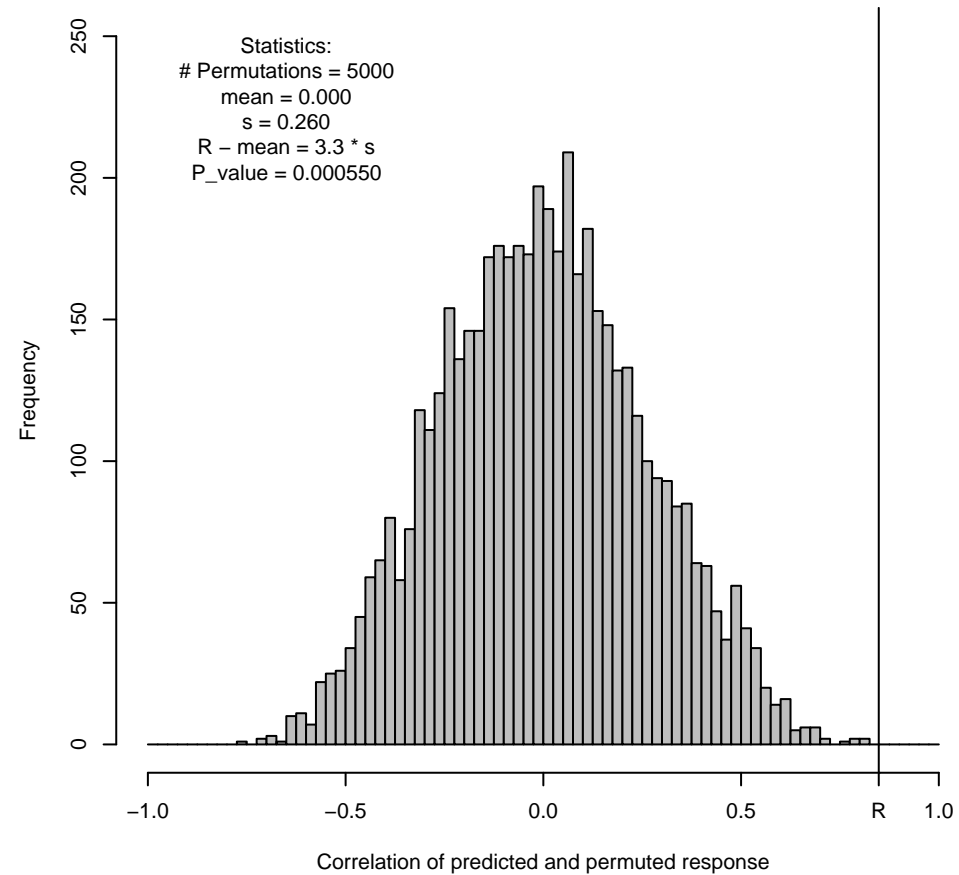

Supplement: ssp105_2.pdf [file ssp105_2.pdf]
